# Supplementary material for: ADAM9 promotes lung cancer progression through vascular remodeling by VEGFA, ANGPT2, and PLAT
Source: PubMed Central journal article supplement (PMC5678093; doi:10.1038/s41598-017-15159-1), 2017-11-08
Supplement: 41598_2017_15159_MOESM1_ESM.pdf [file 41598_2017_15159_MOESM1_ESM.pdf]

# ADAM9 promotes lung cancer progression through vascular remodeling by VEGFA, ANGPT2, and PLAT

Chen-Yuan Lin, Chia-Fong Cho, Shih-Ting Bai, Jing-Pei Liu, Ting-Ting Kuo, Li-Ju Wang, Yu-Sen Lin, Ching Chan Lin, Liang-Chuan Lai, Tzu-Pin Lu, Chih-Ying Hsieh, Chin-Nan Chu, Da-Chuan Cheng, Yuh-Pyng Sher

Fig. 1C (full-length gels)

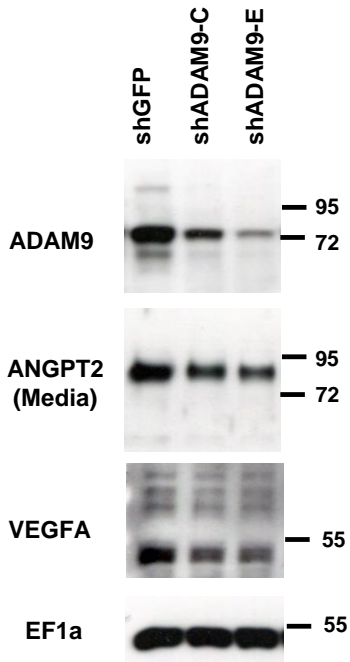

Fig. 1D (full-length gels)

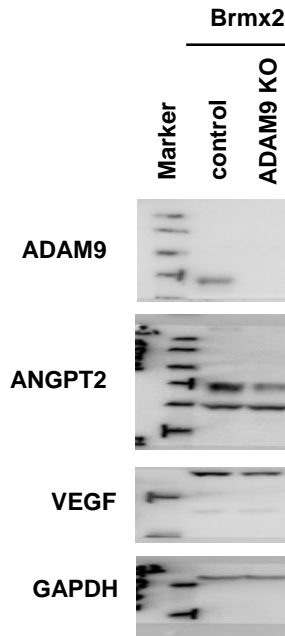

Fig. 1E (full-length gels)

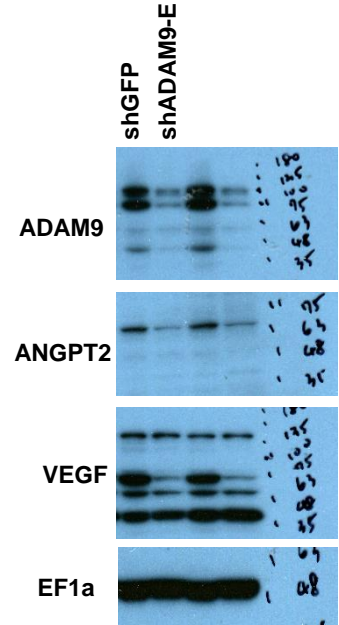

Fig. 1F (full-length gels)

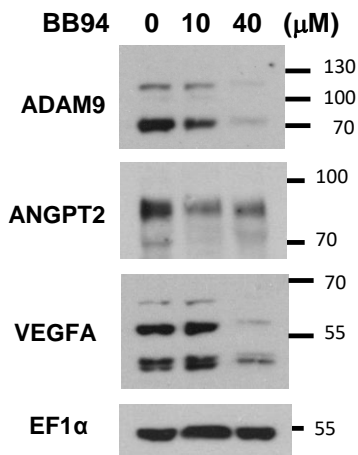

Fig. 1G (full-length gels)

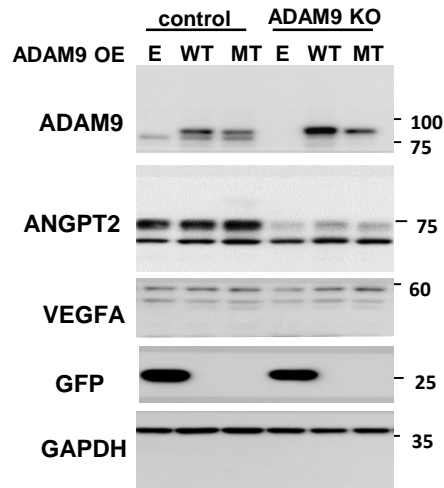

Supplementary Figure 1. Full-length blots of Figure 1.
